# Supplementary material
Source: publisher figshare collection journal article supplement (https://sage.figshare.com/ndownloader/files/14523305)
Supplement: Supplementary file 1 [file 14523305]

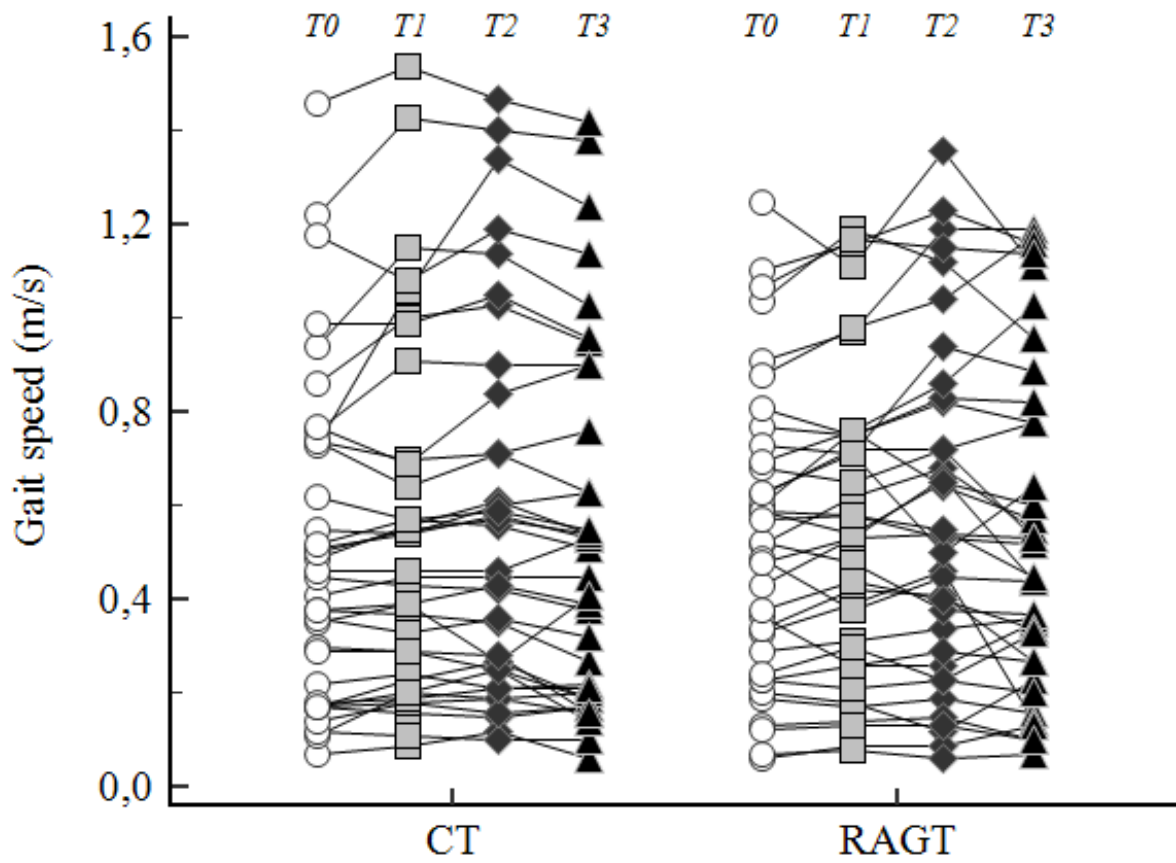

Gait speed values of each patient for all timepoints.

Abbreviations: RAGT, Robot-Assisted Gait Training; CT, Conventional Therapy; T0, baseline; T1, after 6-session; T2, end of treatment; T3, 3-month follow-up;
